# Supplementary material
Source: ML conference proceedings conference paper supplement (https://openreview.net/forum?id=rMf6B8sqg5)

# Deterministic Transfer-based Black-box Attack

Lower success rate

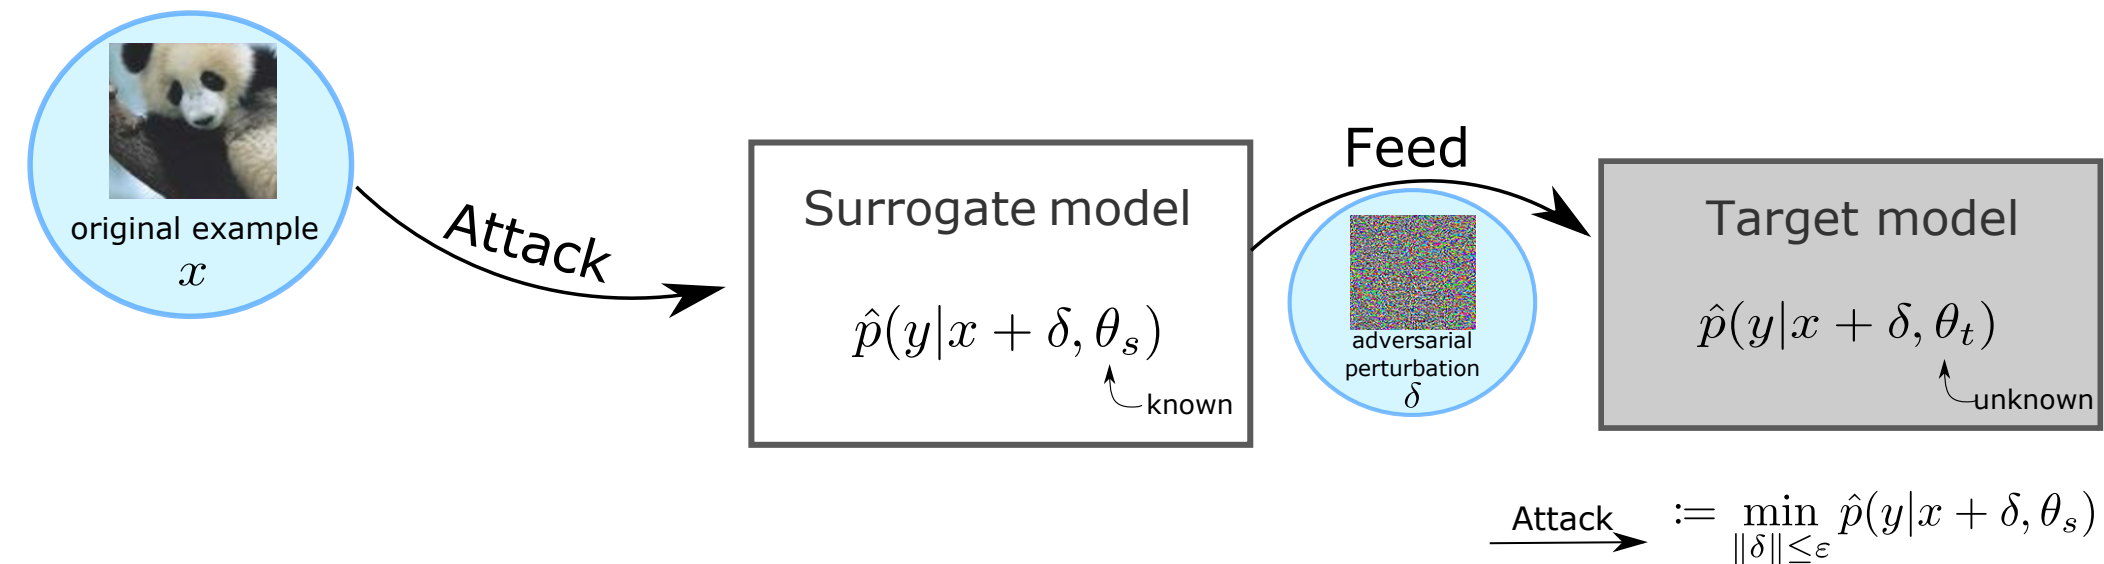

# Bayesian Transfer-based Black-box Attack

Higher success rate

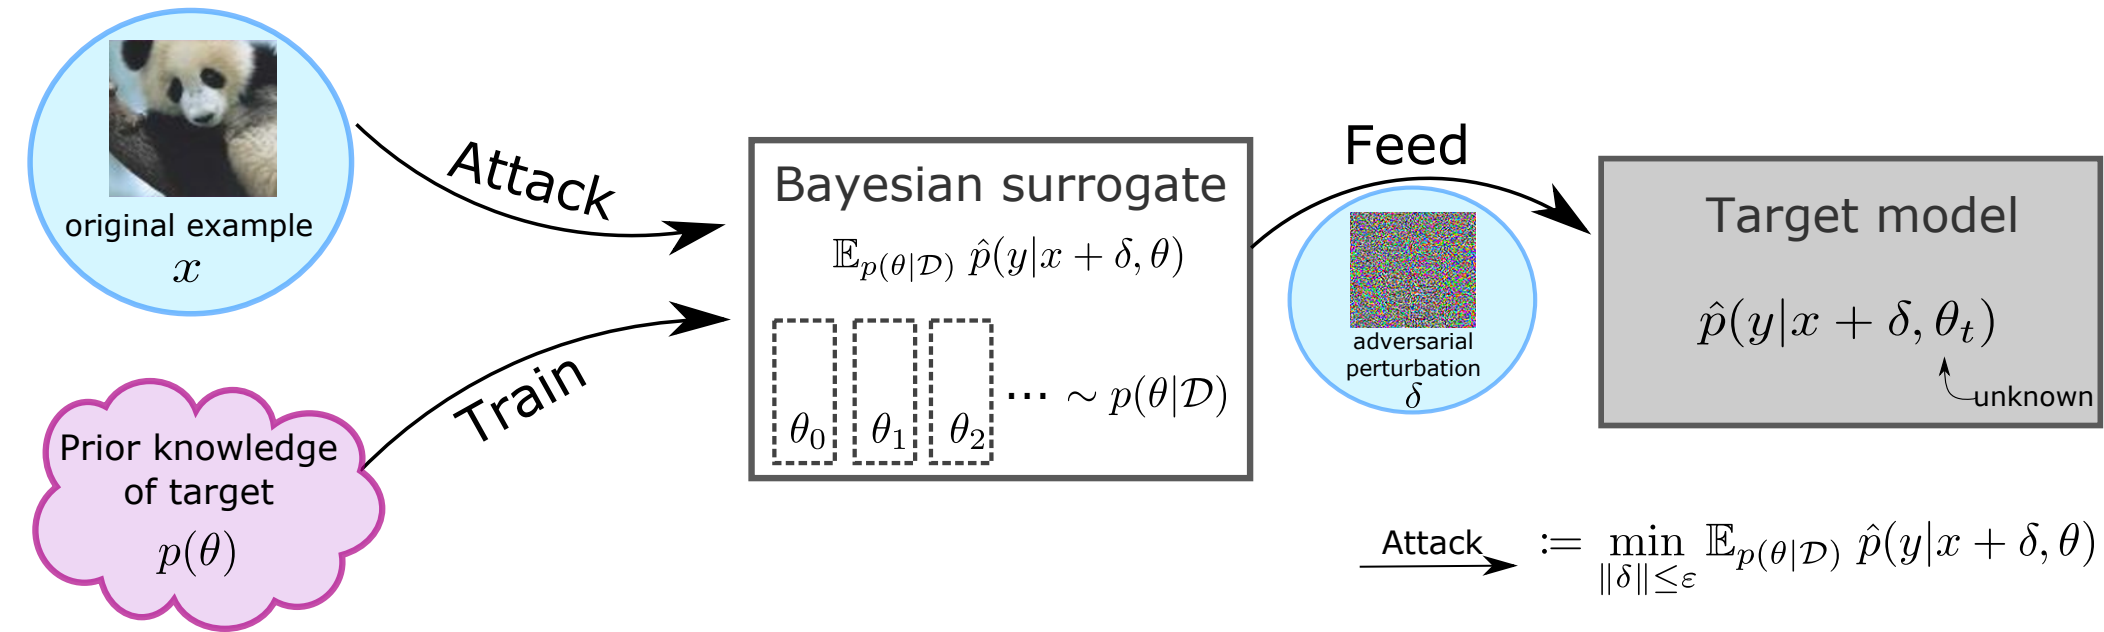

Supplement: supplementary_material [file attachment]
