# Supplementary material
Source: ML conference proceedings conference paper supplement (https://openreview.net/forum?id=rMf6B8sqg5)

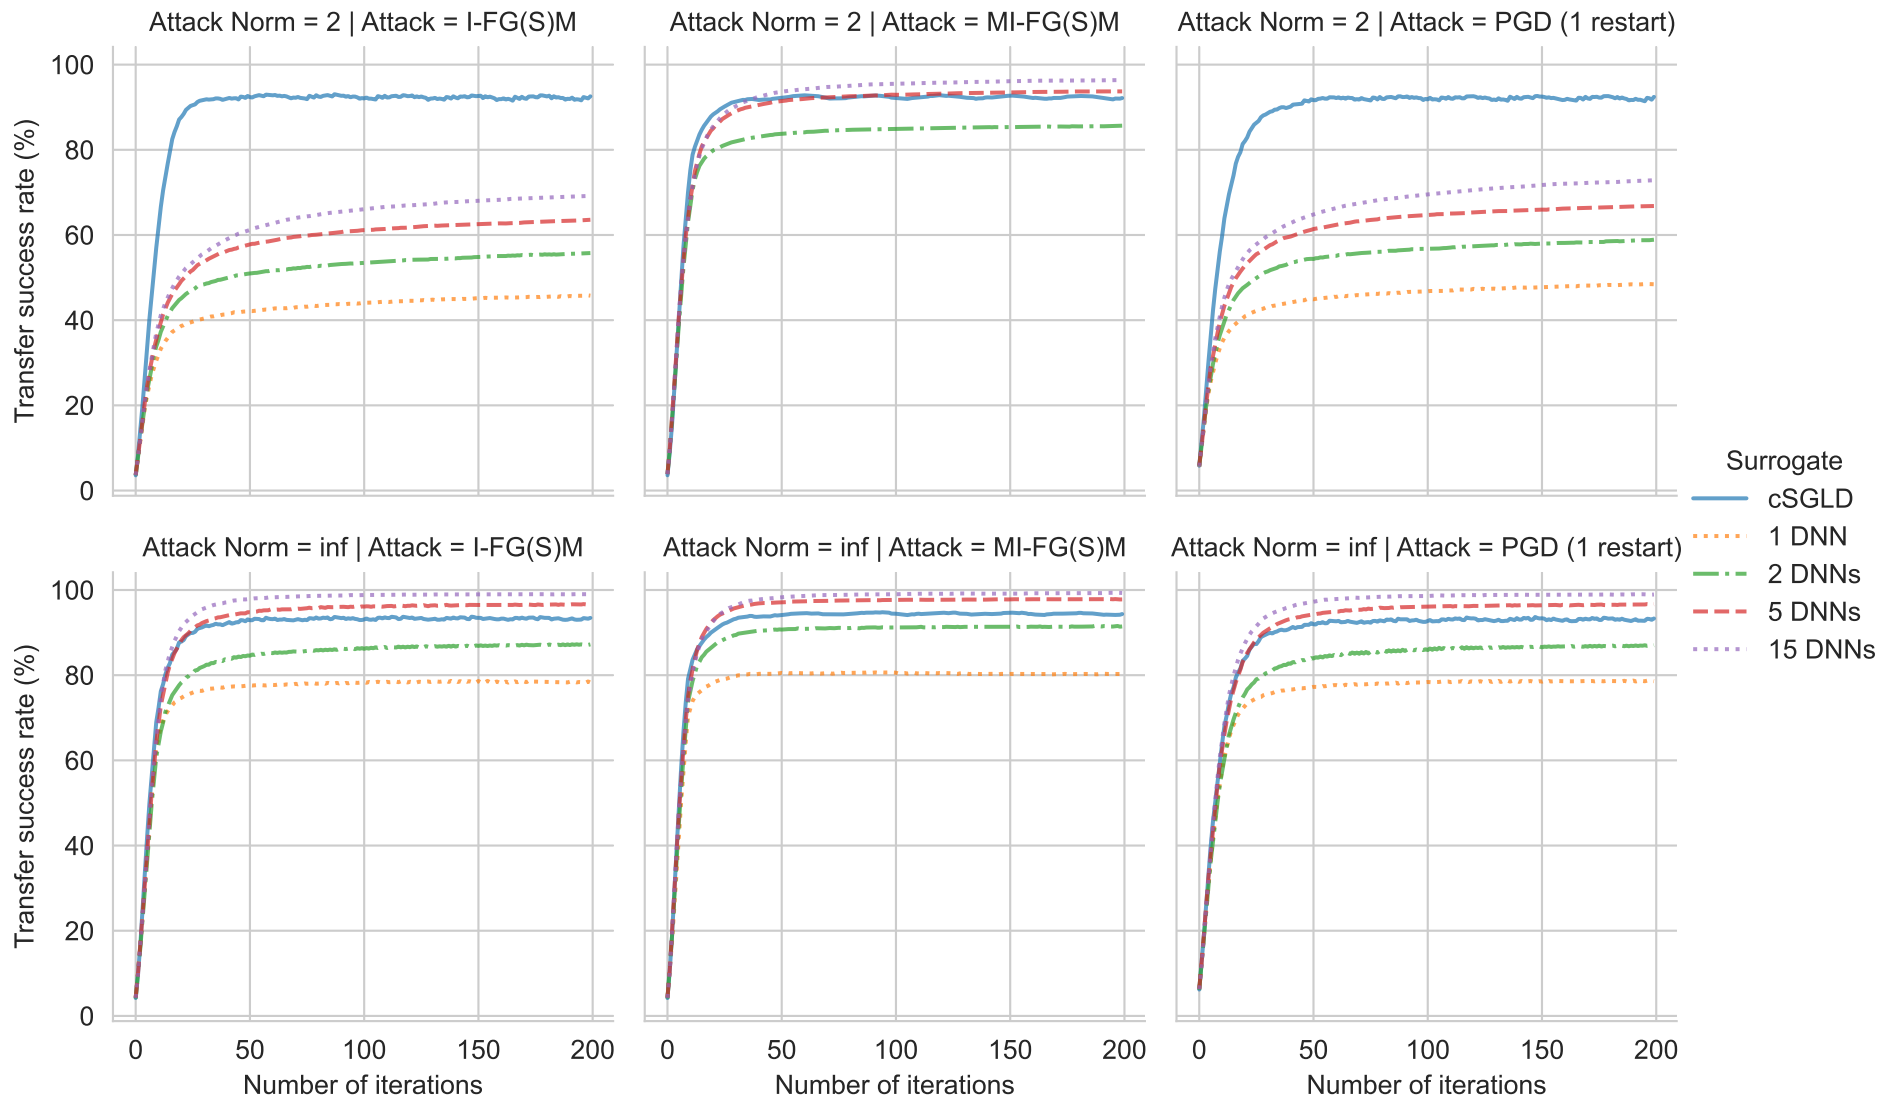

Supplement: supplementary_material [file attachment]

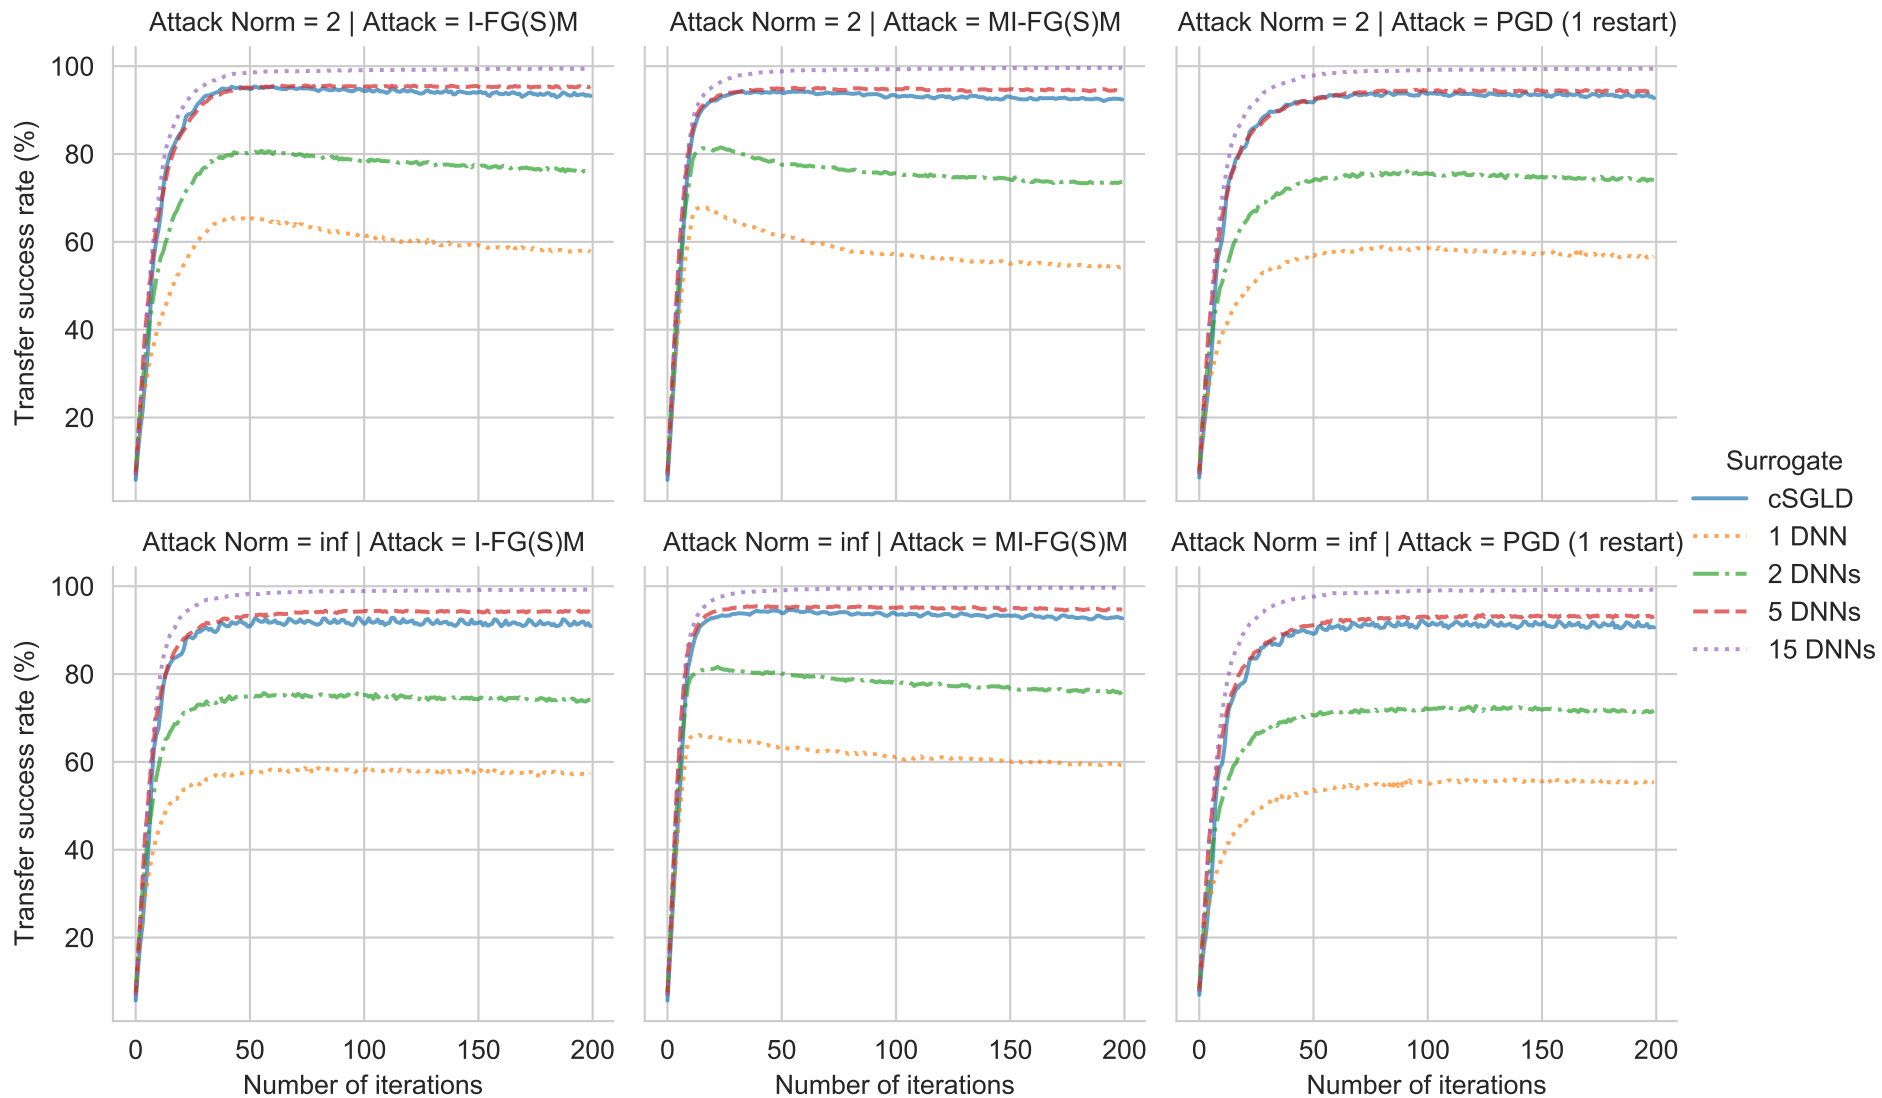

Supplement: supplementary_material [file attachment]

-- Exploration Stage      — Sampling Stage      — Decay Stepsize

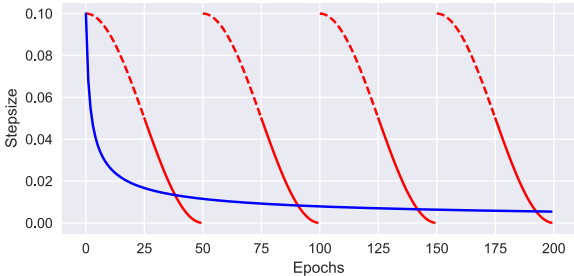

Supplement: supplementary_material [file attachment]

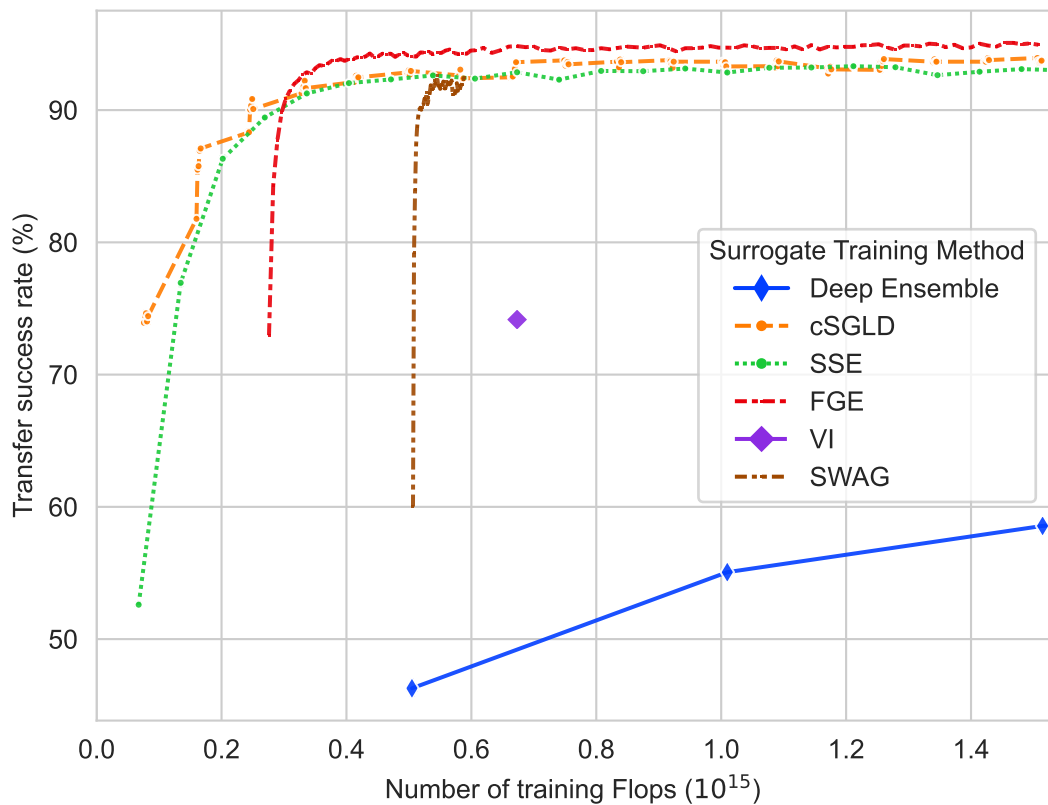

Supplement: supplementary_material [file attachment]

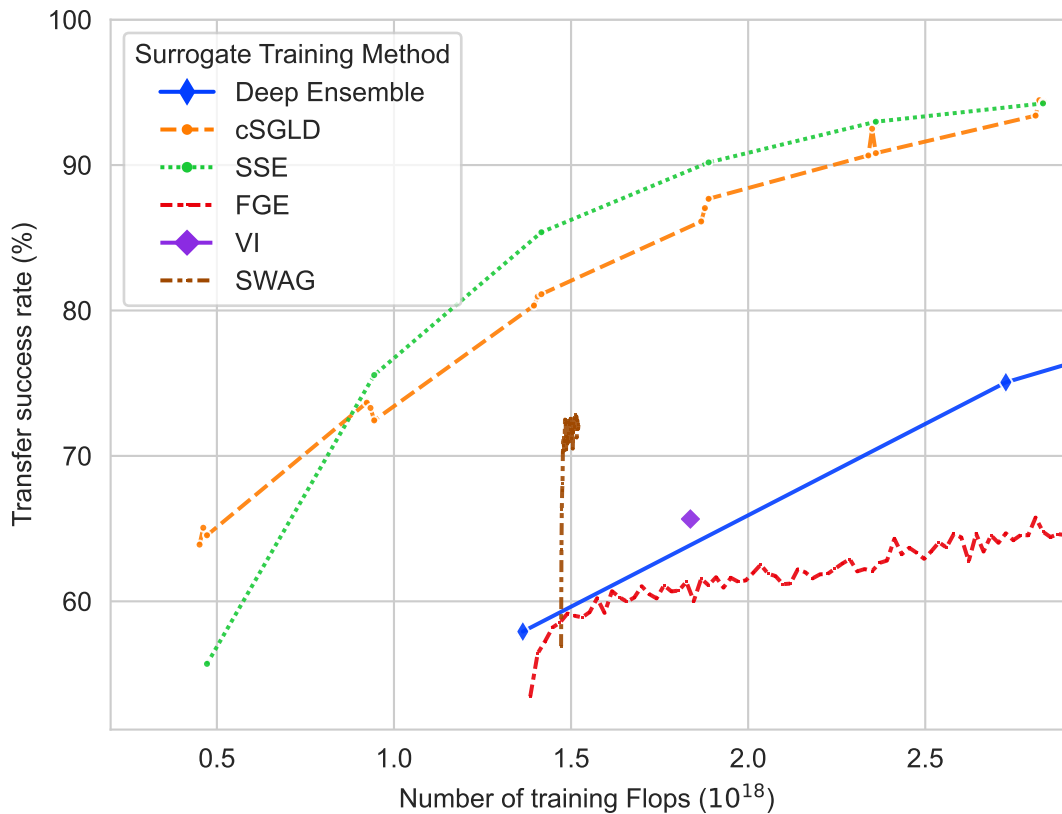

Supplement: supplementary_material [file attachment]

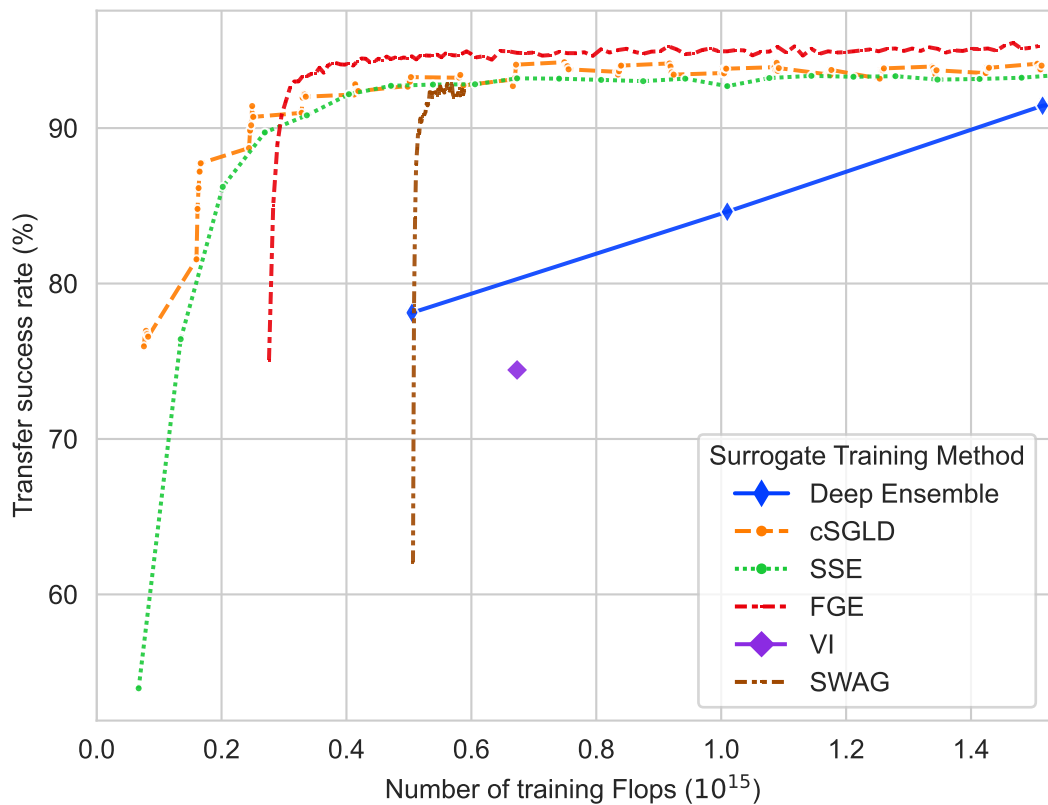

Supplement: supplementary_material [file attachment]

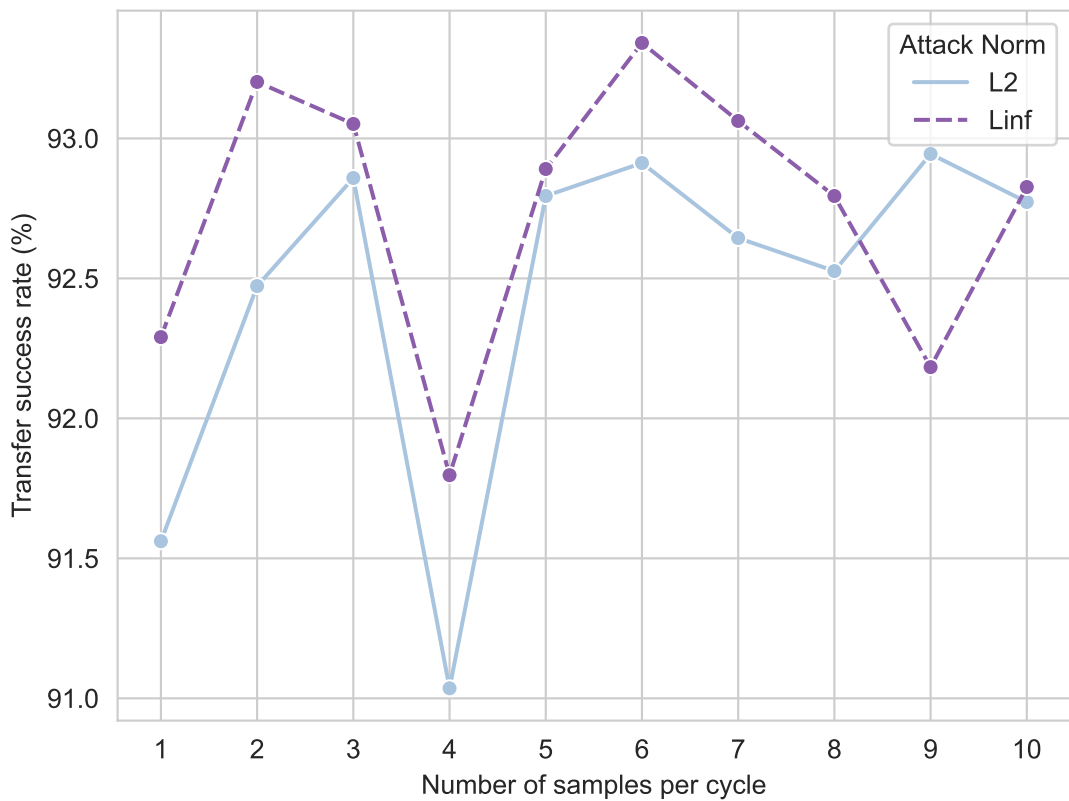

Supplement: supplementary_material [file attachment]

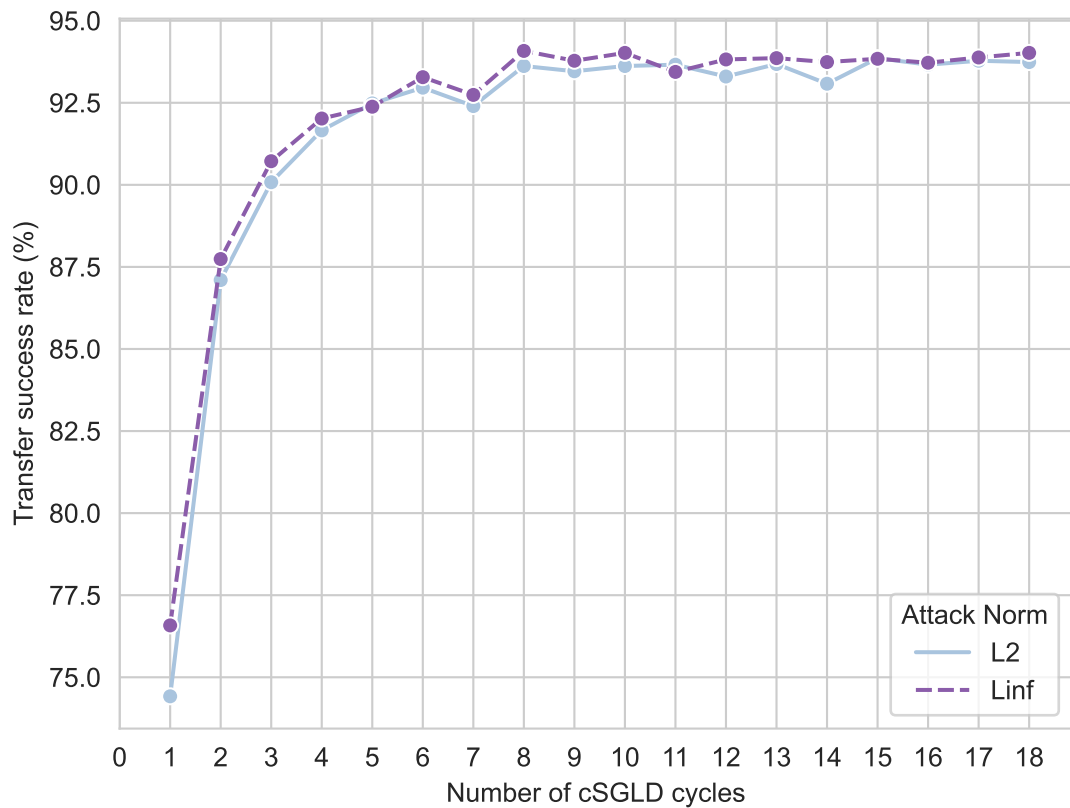

Supplement: supplementary_material [file attachment]

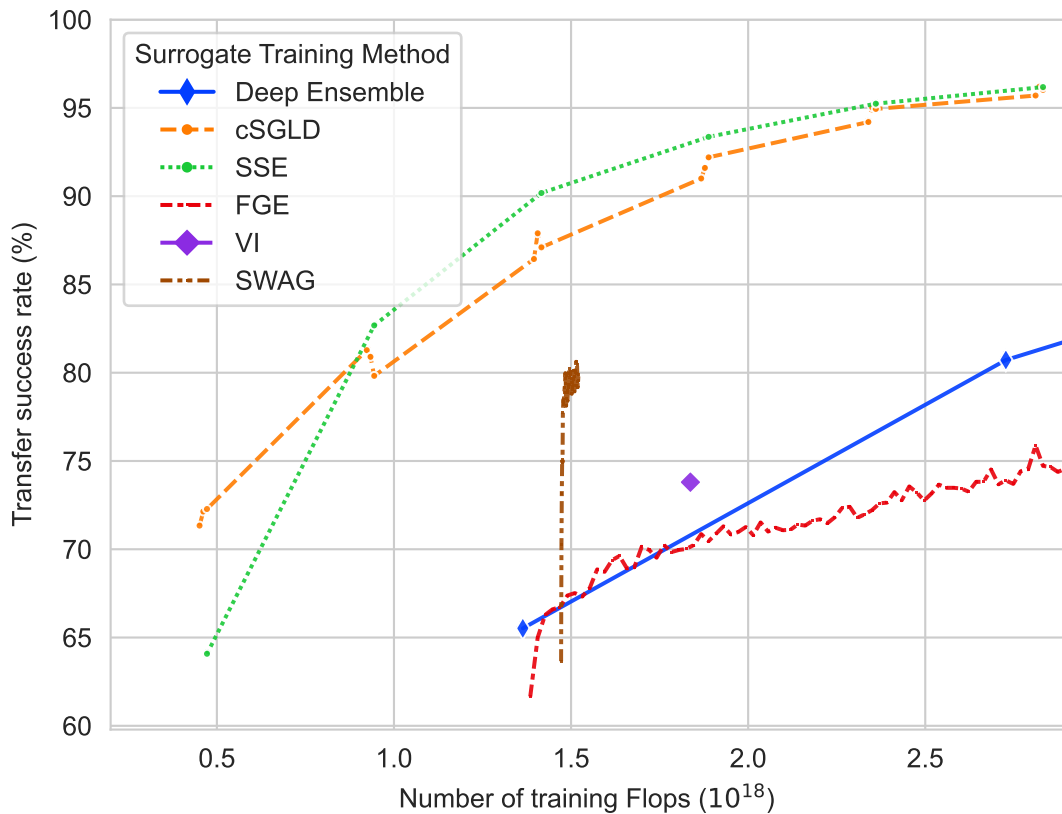

Supplement: supplementary_material [file attachment]

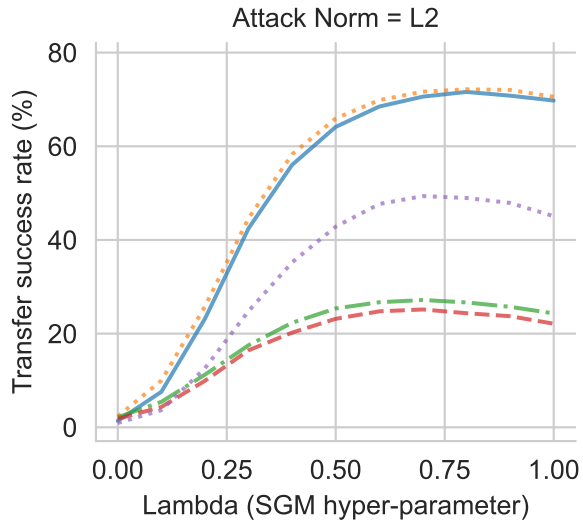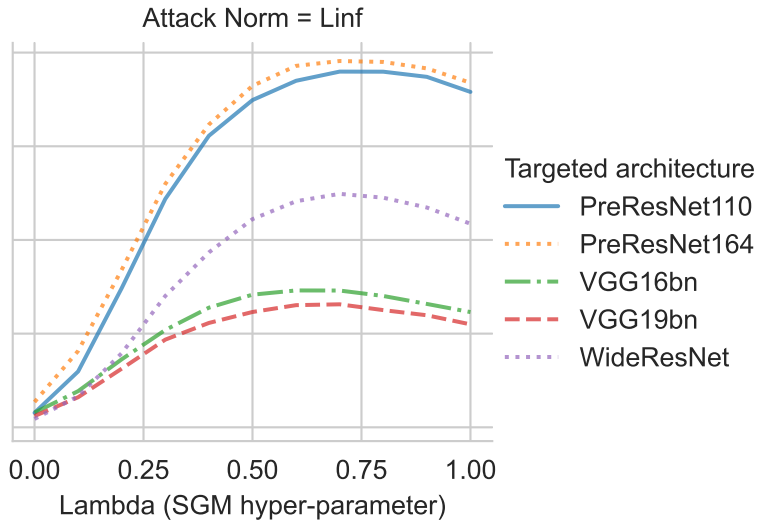

Supplement: supplementary_material [file attachment]
